# Supplementary material for: Effect of Dexmedetomidine on Posttraumatic Stress Disorder in Patients Undergoing Emergency Trauma Surgery: A Randomized Clinical Trial
Source: PubMed Central journal article supplement (PMC10276303; doi:10.1001/jamanetworkopen.2023.18611), 2023-06-16
Supplement: jamanetwopen-e2318611-s001.pdf [file jamanetwopen-e2318611-s001.pdf]

## Clinical Study Protocol

1

2

3 **TITLE:** Effect of dexmedetomidine on posttraumatic stress disorder in emergency trauma surgery  
4 patients: a randomized **controlled** trial

5

6 **PRINCIPAL INVESTIGATOR:** Youjia Yu, MD; Yan Li, MD; Rui Yao, MD; Yangzi Zhu, MD.

7

### 8 **PROTOCOL SYNOPSIS**

|                              |                                                                                                                                                                                                                                                                         |
|------------------------------|-------------------------------------------------------------------------------------------------------------------------------------------------------------------------------------------------------------------------------------------------------------------------|
| <b>Title:</b>                | Effect of dexmedetomidine on posttraumatic stress disorder in emergency trauma surgery patients: a randomized <b>controlled</b> trial                                                                                                                                   |
| <b>Study Type:</b>           | A prospective, Multicenter, randomized, double-blind <b>controlled</b> trial                                                                                                                                                                                            |
| <b>Corresponding Author:</b> | Yangzi Zhu, Jiangsu Province Key Laboratory of Anesthesiology, Xuzhou Medical University; Department of Anesthesiology, Xuzhou Central Hospital, Xuzhou, Jiangsu, China. Rui Yao, Department of Anesthesiology, Xuzhou First People's Hospital, Xuzhou, Jiangsu, China. |
| <b>Lead site:</b>            | Xuzhou Central Hospital, Xuzhou Medical University                                                                                                                                                                                                                      |

|                               |                                                                                                         |
|-------------------------------|---------------------------------------------------------------------------------------------------------|
| <b>Participating centers:</b> | 1. Suzhou Xiangcheng People's Hospital<br>2. Xuzhou Renci Hospital<br>3. Xuzhou First People's Hospital |
| <b>Trial Registration:</b>    | Chinese Clinical Trial Register Identifier:<br>ChiCTR2200056162.                                        |

9 **I. STUDY OBJECTIVES**

10 PTSD is quite common in people who have suffered trauma, especially those hospitalized for  
11 surgery. Dexmedetomidine may reduce or reverse the early consolidation and formation of  
12 conditioned fear memory and prevent the occurrence of postoperative PTSD.

13 The aim of this prospective study was to evaluate the effects of [intraoperative and postoperative](#)  
14 low-dose intravenous pumping dexmedetomidine or placebo on PTSD among trauma patients  
15 undergoing emergency surgery.

16

## 17 II. BACKGROUND

### 18 A. Post-traumatic Stress Disorder

19 Post-traumatic stress disorder (PTSD) is a psychiatric disorder that develops after experiencing  
20 major trauma<sup>1</sup>, involving a combination of recurring and distressing re-experiencing(e.g., flashbacks,  
21 intrusive thoughts), avoidance, negative alterations in mood and cognition, and hyperarousal. Similar  
22 or related stimuli may persist for years or decades, with recurrent episodes of traumatic experiences  
23 and sustained increases in vigilance and avoidance<sup>2-4</sup>. This mental state is highly debilitating and  
24 severely interferes with daily life and social activities<sup>5,6</sup>. Worldwide, the incidence of PTSD can be as  
25 high as 10%–22% in recent years, showing a significant upward trend, due to the frequent  
26 occurrence of traffic accidents, natural disasters, wars, and terrorist violence<sup>7-9</sup>. Studies have shown  
27 that the prevalence of PTSD in the general US population is 6%–8%, and it can be as high as 13%–  
28 30% in the military<sup>10,11</sup>. The incidence of PTSD after trauma hospitalization can be as high as 23%<sup>12</sup>.  
29 Once PTSD is formed, it can be difficult to manage and is linked to increased risk of suicide, posing  
30 a serious burden to the family and society<sup>7,13,14</sup>. Therefore, early and timely intervention for patients  
31 with trauma is particularly critical to prevent PTSD.

32

### 33 B. The Pathogenesis of PTSD

34 The pathogenesis of PTSD is complex, and its exact neurobiological mechanism is still unclear<sup>15</sup>.  
35 Studies have shown that recurrent traumatic experience is one of the core symptoms of PTSD, which  
36 is found to be closely related to abnormally strengthened fear memory<sup>16,17</sup>. Because of the Pavlovian  
37 conditioning principle, environmental information at the time of the trauma, e.g., loud sounds,  
38 objects, are associated with the aversive experience (e.g., accident, fall injury). Wounded persons  
39 re-exposure to a similar environment may bring back fear memory and lead to physiological and  
40 behavioral reactions, which is called fear conditioning<sup>18</sup>. Fear conditioning is pointed out as an  
41 outstanding memory feature of PTSD that can explain re-experiencing and, in part, avoidance  
42 symptoms<sup>19</sup>. Therefore, intervening in the consolidation and formation of conditioned fear memory  
43 is particularly critical to prevent PTSD in patients with trauma in the emergency department, who are  
44 in the early stage of fear memory formation and are not yet firmly consolidated.

45

### 46 C. Dexmedetomidine

47 Dexmedetomidine is widely used in clinical anesthesia to optimize anesthesia and analgesia effects  
48 and reduce intraoperative adverse reactions<sup>20</sup>. [A preclinical study shows that dexmedetomidine could](#)  
49 [alleviate anxiety-like behavior and cognitive impairment in PTSD model rats](#)<sup>21</sup>. In clinical studies,  
50 the perioperative administration of dexmedetomidine had an anxiolytic effect<sup>22,23</sup>. In another study of  
51 conditioned fear memory, dexmedetomidine reduced the strength of the fear memory formed<sup>24</sup>.  
52 Therefore, we speculated that dexmedetomidine might attenuate the formation and consolidation of  
53 conditioned fear memories early in trauma, thereby preventing the development of PTSD. However,  
54 whether dexmedetomidine can reduce the incidence of postoperative PTSD in patients with trauma  
55 in the emergency department is still unclear.

56

57

### 58 **III. METHODS**

59 This multicenter trial was conducted at Suzhou Xiangcheng People's Hospital and three other  
60 tertiary hospitals in Jiangsu Province, China from January 22 to October 20, 2022. The study  
61 protocol was approved by the ethics committees of all participating hospitals and was registered in  
62 the Chinese Clinical Trial Registration Center on January 21, 2022. This report follows the  
63 Consolidated Standards of Reporting Trials (CONSORT) reporting guideline for randomized studies.

64

#### 65 **A. Recruiting Methods**

66 Our research team identified potential participants in the emergency room via the Maddie  
67 Remote intelligent First Aid platform system. Trauma patients 18 to 60 years old, with American  
68 Society of Anesthesiology (ASA) physical status (I&II&III) were eligible for inclusion if they were  
69 preparing for emergency surgery. The research centers will obtain permission from each subject to  
70 use their protected health information through written authorization.

71

#### 72 **B. Inclusion Criteria**

73 Trauma patients (car accident, falling, engineering accident, etc.) undergoing emergency surgery  
74 aged 18 to 60 years with American Society of Anesthesiologists physical status categories I to III  
75 were eligible for inclusion. [Non-elderly adults under 60 years were selected for the following reasons:](#)  
76 [1. Young people who experience traumatic events are more likely to develop PTSD than elders](#)<sup>25</sup>. 2.

77 The inclusion of elderly patients will bring some variables related to advanced age, and these  
78 variables may have interaction or mediation effects with advanced age, which will reduce the  
79 statistical power. 3. For safety reasons, for elderly patients with trauma in the emergency department,  
80 it may not be suitable for a long period of pumping dexmedetomidine during the perioperative period.  
81 ASA I: physical health, good development and nutrition, normal organ function. ASA II: In addition  
82 to the surgical disease, there are mild coexisting diseases and sound functional compensation. ASA  
83 III: Severe comorbidity, limited physical activity, but able to cope with daily activities.

84

### 85 **C. Exclusion Criteria**

- 86 1. Craniocerebral or spinal cord injury, hemorrhagic shock decompensation;
- 87 2. Liver or renal dysfunction;
- 88 3. History of alcohol abuse or drug dependence, history of neurological or psychiatric diseases;
- 89 4. Severe visual, hearing or language impairment;
- 90 5. History of major physical or mental trauma;
- 91 6. Second-degree or third-degree heart blockage, bradyarrhythmia with a baseline rate lower  
92 than 50 beats per minute.

93

### 94 **D. Consent Procedure**

95 All potential subjects who met the inclusion/exclusion criteria as determined by the chief  
96 anesthesiologist or designees were given the opportunity to participate. The family/patients will be  
97 obtained to give assent/consent during the screening visit. They will have the opportunity to review  
98 consent and ask questions about the study. Families/patients will be asked to summarize in their own  
99 words what was involved in the study and how satisfied they were with the risks and benefits of  
100 participating. The researcher will also answer any other questions they have before signing the  
101 consent form. After signing the consent form, the subject will be provided with a signed and dated  
102 copy of the authorization form, and another copy will be placed in the participant's medical record at  
103 four hospital centers.

104

### 105 **E. Randomization and Blinding**

106 Randomization and blinding

107 Eligible participants were randomized to either dexmedetomidine or normal saline placebo (control  
108 group) using a 1:1 ratio by an online central randomization system. The randomization sequence was  
109 based on computer-generated random numbers. Patient clinical management and data collection were  
110 sequentially numbered and disclosed by health care practitioners who were not directly involved.  
111 Each code was assigned by a random number to one of the two groups: the placebo group or the  
112 dexmedetomidine group. An anesthetic nurse who was not otherwise involved in the study prepared  
113 dexmedetomidine and normal saline in advance, and they were each kept in syringes labeled only  
114 with the patient number. The surgeons, study statistician personnel, research staff who assessed the  
115 outcomes, and patients themselves were blinded to the treatment group.

116

#### 117 **F. Sample Size Calculation**

118 According to the literature, the incidence of PTSD among trauma patients 1 month  
119 postoperatively was 23.2%. Our pilot study showed that 11.1% of patients with trauma in the  
120 emergency department who received dexmedetomidine during surgery developed PTSD 1 month  
121 postoperatively. Hence, this trial required 152 patients in each group with a power of 80% at a  
122 significance of  $\alpha = 0.05$ . We decided to recruit 350 patients (with 175 in each group) considering a  
123 possible dropout rate of 15%.

#### 124 **G. Statistical Analysis**

125 The outcome analyses were performed in the modified intention-to-treat population. The data  
126 were analyzed using SPSS statistical software version 23.0 (IBM). The Kolmogorov–Smirnov test  
127 was used to determine whether the continuous data conformed to the normal distribution. Continuous  
128 variables were presented as the mean  $\pm$  standard deviation or medians (Inter quartile range, IQR).  
129 The continuous data with normal distribution were compared with the independent-sample t test. The  
130 continuous data with nonnormal distribution were analyzed using the Kruskal–Wallis rank-sum test.  
131 Associations between categorical variables were assessed using the  $\chi^2$  test or Fisher exact test. The  
132 odds ratio (OR) and 95% confidence interval (CI) were calculated to analyze the effect of  
133 dexmedetomidine on the prevention of PTSD in the primary outcome. The association between the  
134 primary outcome and intervention were adjusted for some potential confounding using binary  
135 logistic regression, including age, sex, smoking, trauma time, ISS, APACHE II, ICU admission, type  
136 of surgery, study sites and duration of surgery. The odds ratio (OR) and 95% confidence interval (CI)

137 were calculated to analyze the association between dexmedetomidine dose and occurrence of PTSD  
138 in the post hoc analyses. The association between dexmedetomidine dose and occurrence of PTSD  
139 were adjusted for some potential confounding using binary logistic regression, including age, sex,  
140 smoking, trauma time, ISS, APACHE II, ICU admission, type of surgery, study sites and duration of  
141 surgery. Repeated measures of continuous variables at different time in secondary outcomes were  
142 analyzed using repeated measures analysis of variance (ANOVA). Spearman's correlation test was  
143 used to analyze the correlation between dexmedetomidine dose and CAPS-5 score in the post hoc  
144 analysis. P value <0.05 indicated a statistically significant association.

145

146

## 147 **H. Interventions**

148 Dexmedetomidine or placebo (normal saline) was administered at a maintenance dose of 0.1  
149  $\mu\text{g}/(\text{kg} \cdot \text{h})$  from the start of anesthesia until the end of surgery and at the same rate after surgery from  
150 9 p.m. to 7 a.m. on days 1–3.

151

## 152 **I. Administration Method**

153 Based on previous studies and a pilot study, dexmedethidine infused at a dose of 0.1 $\mu\text{g}/\text{kg}$  per  
154 hour (maintained during surgery and from 9 pm to 7 am on postoperative days 1-3) can reduce  
155 perioperative anxiety symptoms and significantly improve sleep quality without significant  
156 circulatory effects. The pump protocol has good relative compliance. For the above reasons, we  
157 finally selected the low-dose dexmedetomidine pump injection scheme.

158

## 159 **J. Management of the perioperative period**

### 160 1. Preoperative assessment

161 During the preoperative assessment, we collected baseline data include demographic  
162 characteristics, past history and American Society of Anesthesiologists (ASA) classification. Acute  
163 physiology and chronic health Evaluation II (APACHE II) and injury severity score (ISS) were  
164 used to assess the severity of trauma. And we obtained the informed consent of patients or family  
165 members if eligible.



## 166 2. Management of premedication

167 The study medication (dexmedetomidine hydrochloride, 200 µg/2 mL, and normal saline, 2 mL)  
168 was provided and assigned on the basis of randomization by an anesthetic nurse who was not  
169 involved in the rest of the study. The drug was diluted to 50 mL with normal saline before  
170 administration (i.e., dexmedetomidine hydrochloride at a final concentration of 4µg/mL).  
171 Dexmedetomidine or placebo (normal saline) was administered at a maintenance dose of 0.1µg/kg  
172 per hour from the start of anesthesia until the end of surgery and at the same rate after surgery from 9  
173 p.m. to 7 a.m. on days 1 through 3. The infusion of dexmedetomidine or placebo was suspended or  
174 permanently stopped during or after the operation according to the patients' own condition or other  
175 objective factors. The dose of infusion was recorded.

## 176 3. Management of general anesthesia

177 Intraoperative monitoring included non-invasive blood pressure, electrocardiogram (ECG),  
178 SpO<sub>2</sub>, radial artery blood pressure and nasopharyngeal temperature. Intravenous anesthesia induction  
179 was performed using midazolam, sufentanil, etomidate and rocuronium. After successful tracheal  
180 intubation, the patient was mechanically ventilated and end-tidal carbon dioxide (PETCO<sub>2</sub>) was  
181 maintained between 35 and 45 mmHg. Anesthesia was maintained using propofol, remifentanil and  
182 cisatracurium to keep a bispectral index values of 40 to 60. Hypotension (mean arterial pressure <65  
183 mmHg or a decrease of 20% from baseline) and bradycardia (heart rate <50 beats/min) were treated.  
184 A thermal blanket was used during the operation to maintain nasopharyngeal temperature above  
185 36 °C.

## 186 4. Postoperative Analgesia

187 PCIA was used in both groups. Postoperative analgesia was achieved with 3 µg/kg of sufentanil  
188 and 20 mg of azasetron in 100 mL of normal saline. The background infusion rate was 2 mL/h. After  
189 returning to the ward, if the VAS pain score >4, intravenous flurbiprofen axetil 100mg.

## 190 5. Management of hypotension and bradycardia

191 When the mean arterial pressure is lower than 65, fluid infusion or vasoactive drugs should be  
192 used. Atropine 0.5mg if heart rate is less than 45 beats per minute; If more than two treatments were  
193 performed during the operation or on the same night, the pump speed of dexmedetomidine (normal  
194 saline) was reduced (intraoperative) or the pump was stopped. Depending on the patient's daytime  
195 condition, if daytime hypotension or a heart rate of less than 45 beats per minute occurred for two

196 consecutive days, dexmedetomidine pumping was permanently discontinued during the following  
197 night.

198

#### 199 **K. Surgical anatomical sites**

200 Intestines, liver, spleen, limb, lungs, ribs or diaphragm.

201

#### 202 **L. Outcome measures:**

203 **The primary outcome** was the occurrence of PTSD. It was assessed with the  
204 Clinician-Administered PTSD Scale for DSM-5 (CAPS-5) 1 month after surgery. **The CAPS-5 score**  
205 **(derived from the CAPS-5 scale) was used to evaluate PTSD severity.** At the beginning of the study,  
206 our research team used CAPS-5 score and PTSD Checklist for DSM-5 (PLC-5) score simultaneously  
207 to evaluate trauma patients. As participants generally reported that the evaluation time was too long  
208 and their cooperation was not good, we finally selected CAPS-5 score for evaluation after the  
209 approval of the Ethics Committee. Professionally trained doctors, blinded to treatment group  
210 assignments, carried out the **diagnostic assessments** at both times in tranquil surroundings. The  
211 CAPS-5 is a structured diagnostic interview and considered the gold standard in PTSD evaluation.  
212 The CAPS-5 provides a continuous measure of the severity of overall PTSD and of the four  
213 symptom clusters (intrusions, avoidance, negative alterations in cognition/mood, arousal and  
214 reactivity) and presence/absence of PTSD diagnosis, which can be administered by appropriately  
215 trained paraprofessionals. The diagnosis requirement can be summarized as an exposure to a stressor  
216 that is accompanied by at least one intrusion symptom, one avoidance symptom, two negative  
217 alterations in cognitions and mood symptoms, and two arousal and reactivity turbulence symptoms,  
218 persisting for at least one month, with functional impairment.

219 **The secondary outcomes** included postoperative (24h, 48h and 1month) pain using the Visual  
220 Analogue Scale (VAS), Postoperative delirium using the confusion assessment method criteria  
221 (measured twice daily for 3 days) , nausea, itching, subjective sleep quality (measured for 3 days)  
222 using Numerical Rating Scale (NRS), anxiety (measured for 3 days) using Beck Anxiety Inventory  
223 (BAI), and occurrence of adverse events (including hypertension, hypotension, bradycardia,  
224 tachycardia, hypoxemia, and other complications such as cerebrovascular events, myocardial  
225 infarction, heart failure, and acute kidney injury).

226

#### 227 **IV. SAFETY CONCERNS**

228 Dexmedetomidine is becoming increasingly popular as it promotes a natural, non  
229 rapid-eye-movement sleep, anxiolysis, and analgesia, without concurrent respiratory depression.  
230 Hypotension and bradycardia are potential hemodynamic side effects of dexmedetomidine, but most  
231 studies found these effects to be self-limiting and clinically benign. Generally, dexmedetomidine has  
232 been administered to millions of patients in various surgical procedures every year for at least 20  
233 years, with a good safety profile in the perioperative use and use for the intensive care. To maximize  
234 safety, strict screening criteria were used to exclude patients with hemodynamic instability,  
235 bradycardia, or second degree or greater block, and low-dose dexmedetomidine (0.1µg/kg per hour)  
236 was administered. To maximize safety, strict screening criteria were used to exclude patients with  
237 hemodynamic instability, bradycardia, or second degree or greater block, and a low-dose of  
238 dexmedetomidine (0.1ug/kg/hour) was administered. We also implemented a dual management plan  
239 for potential risks (**J. Management of the perioperative period**) to ensure patient safety.

#### 240 **V. NONCOMPLIANCE RATE REPORT AND IMPROVEMENT**

241 The rate of non-compliance was 20.1% in the dexmedetomidine group and 24.4% in the control  
242 group(please see them in eTable2). The primary reasons were as follows: 1. To maximize safety,  
243 infusion of dexmedetomidine (or normal saline) was discontinued in patients who had two decreases  
244 in blood pressure or a heart rate of less than 45 beats per minute that required medical management  
245 one night (the first day included the daytime intraoperative period). Depending on the patient's  
246 daytime condition, if daytime hypotension or a heart rate of less than 45 beats per minute occurred  
247 for two consecutive days, dexmedetomidine pumping was permanently discontinued the following  
248 night. 2. Some patients did not return to the ward before 9 PM for intervention; 3. Some patients'  
249 family members turned off the infusion pump, due to equipment error alarm. At first, for safety  
250 reasons, the researchers informed the patients and their families that they could immediately turn off  
251 the infusion pump and call the nurse if they had discomfort symptoms such as palpitations and chest  
252 tightness. In the later stage, we made improvements, and informed the patients and their families that  
253 if they had discomfort symptoms such as palpitation and chest tightness, they should call the nurses,  
254 and refrain from turning off the infusion pump by themselves.

#### 255 **VI. DATE AND SAFETY MONITORING**

256 Handle and follow up until properly solved or the condition is stable, and timely report serious  
257 adverse events and accidents to the ethics committee, competent authorities and drug regulatory  
258 authorities as required; The principal investigators performed a cumulative review of all adverse  
259 events at regular intervals and convened investigators' meetings as necessary to assess the risks and  
260 benefits of the study. This study was a double-blind trial, and blinding was opened if necessary to  
261 ensure the safety and rights of the subjects. An independent data monitor will be assigned to monitor  
262 the study data, and an independent data and safety monitoring board will be established for high-risk  
263 studies to monitor accumulated safety and efficacy data to determine whether to continue the study.  
264 Clinical research will develop corresponding data safety monitoring programs according to the risk  
265 level.

266

## 267 **VII. FUNDING**

268 This clinical research received National Natural Science Foundation of China (81801332);  
269 Science and Technology Development Plan Project of Suzhou(SKJYD2021035); Science and  
270 Technology Development Plan Project of Suzhou(SKJYD2022078).

271

## 272 **VIII. INFORMATION CONFIDENTIALITY**

273 The medical records were kept at the hospital and were accessible to the investigators and the  
274 ethics committee, which had access to the patient's medical records. Any public reporting of the  
275 results of this study will not reveal the individual identity of the patients. The patient's personal  
276 information and medical records are kept strictly confidential.

277

## 278 **IX. REFERENCES**

- 279 Hori H, Kim Y. Inflammation and post-traumatic stress disorder. *Psychiatry Clin Neurosci.*  
280 2019;73(4):143-153. doi:10.1111/pcn.12820.
- 281 2. Koirala R, Søegaard EGI, Thapa SB. Updates on Pharmacological Treatment of Post-Traumatic  
282 Stress Disorder. *JNMA J Nepal Med Assoc.* 2017;56(206):274-280. doi:10.31729/jnma.3108.
- 283 3. He M, Wei JX, Mao M, et al. Synaptic Plasticity in PTSD and associated Comorbidities: The  
284 Function and Mechanism for Diagnostics and Therapy. *Curr Pharm Des.* 2018;24(34):4051-4059.  
285 doi:10.2174/1381612824666181120094749.

- 286 4. Qi W, Gevonden M, Shalev A. Prevention of Post-Traumatic Stress Disorder After Trauma:  
287 Current Evidence and Future Directions. *Curr Psychiatry Rep.* 2016;18(2):20.  
288 doi:10.1007/s11920-015-0655-0.
- 289 5. McCleery JM, Harvey AG. Integration of psychological and biological approaches to trauma  
290 memory: implications for pharmacological prevention of PTSD. *J Trauma Stress.*  
291 2004;17(6):485-496. doi:10.1007/s10960-004-5797-5.
- 292 6. Palgi S, Klein E, Shamay-Tsoory S. The role of oxytocin in empathy in PTSD. *Psychol Trauma.*  
293 2017;9(1):70-75. doi:10.1037/tra0000142.
- 294 7. Shalev A, Liberzon I, Marmar C. Post-Traumatic Stress Disorder. *N Engl J Med.* 2017; 376  
295 (25):2459-2469. doi:10.1056/NEJMra1612499.
- 296 8. Bisson JJ, Cosgrove S, Lewis C, Robert NP. Post-traumatic stress disorder. *BMJ.*  
297 2015;351:h6161. doi: 10.1136/bmj.h6161.
- 298 9. Chin WS, Shiao JS, Liao SC, Kuo CY, Chen CC, Guo YL. Depressive, anxiety and post-traumatic  
299 stress disorders at six years after occupational injuries. *Eur Arch Psychiatry Clin Neurosci.*  
300 2017;267(6):507-516. doi:10.1007/s00406-016-0762-x.
- 301 10. Usuki M, Matsuoka Y, Nishi D, et al. Potential impact of propofol immediately after motor  
302 vehicle accident on later symptoms of posttraumatic stress disorder at 6-month follow up: a  
303 retrospective cohort study. *Crit Care.* 2012;16(5):R196. doi:10.1186/cc11681.
- 304 11. Kok BC, Herrell RK, Thomas JL, Hoge CW. Posttraumatic stress disorder associated with  
305 combat service in Iraq or Afghanistan: reconciling prevalence differences between studies. *J Nerv*  
306 *Ment Dis.* 2012;200(5):444-450. doi:10.1097/NMD.0b013e3182532312.
- 307 12. Zatzick DF, Rivara FP, Nathens AB, et al. A nationwide US study of post-traumatic stress after  
308 hospitalization for physical injury. *Psychol Med.* 2007;37(10):1469-1480.  
309 doi:10.1017/S0033291707000943.
- 310 13. Stanley IH. Advancements in the understanding of PTSD and suicide risk: Introduction to a  
311 special section. *Psychol Trauma.* 2021;13(7):723-724. doi:10.1037/tra0001121.
- 312 14. Schrader C, Ross A. A Review of PTSD and Current Treatment Strategies. *Mo Med.*  
313 2021;118(6):546-551.
- 314 15. Szeszko PR, Lehrner A, Yehuda R. Glucocorticoids and Hippocampal Structure and Function in  
315 PTSD. *Harv Rev Psychiatry.* 2018;26(3):142-157. doi:10.1097/HRP.000000000000188.

- 316 16. Kida S. Reconsolidation/destabilization, extinction and forgetting of fear memory as therapeutic  
317 targets for PTSD. *Psychopharmacology (Berl)*. 2019;236(1):49-57. doi:10.1007/s00213-018-5086-2.
- 318 17. Sbarski B, Akirav I. Cannabinoids as therapeutics for PTSD. *Pharmacol Ther*. 2020;211:107551.  
319 doi:10.1016/j.pharmthera.2020.107551.
- 320 18. Bowers ME, Ressler KJ. An Overview of Translationally Informed Treatments for Posttraumatic  
321 Stress Disorder: Animal Models of Pavlovian Fear Conditioning to Human Clinical Trials. *Biol*  
322 *Psychiatry*. 2015;78(5):E15-E27. doi:10.1016/j.biopsych.2015.06.008.
- 323 19. Paredes Molina CS, Berry S, Nielsen A, Winfield R. PTSD in civilian populations after  
324 hospitalization following traumatic injury: A comprehensive review. *Am J Surg*.  
325 2018;216(4):745-753. doi:10.1016/j.amjsurg.2018.07.035.
- 326 20. Tasbihgou SR, Barends CRM, Absalom AR. The role of dexmedetomidine in neurosurgery. *Best*  
327 *Pract Res Clin Anaesthesiol*. 2021;35(2):221-229. doi:10.1016/j.bpa.2020.10.002.
- 328 21. Ji MH, Jia M, Zhang MQ, et al. Dexmedetomidine alleviates anxiety-like behaviors and  
329 cognitive impairments in a rat model of post-traumatic stress disorder. *Prog Neuropsychopharmacol*  
330 *Biol Psychiatry*. 2014;54:284-288. doi:10.1016/j.pnpbp.2014.06.013.
- 331 22. Mo Y, Zimmermann AE. Role of dexmedetomidine for the prevention and treatment of delirium  
332 in intensive care unit patients. *Ann Pharmacother*. 2013;47(6):869-876. doi:10.1345/aph.1AR708.
- 333 23. Lim YP, Yahya N, Izaham A, et al. The comparison between propofol and dexmedetomidine  
334 infusion on perioperative anxiety during regional anesthesia. *Turk J Med Sci*. 2018;48(6):1219-1227.  
335 doi:10.3906/sag-1802-126.
- 336 24. Morena M, Berardi A, Peloso A, et al. Effects of ketamine, dexmedetomidine and propofol  
337 anesthesia on emotional memory consolidation in rats: Consequences for the development of  
338 post-traumatic stress disorder. *Behav Brain Res*. 2017;329:215-220. doi:10.1016/j.bbr.2017.04.048.
- 339 25. Karam EG, Friedman MJ, Hill ED, et al. Cumulative traumas and risk thresholds: 12-month  
340 PTSD in the World Mental Health (WMH) surveys. *Depress Anxiety*. 2014;31(2):130-142.  
341 doi:10.1002/da.22169.
- 342
- 343
