# Supplementary material for: Effect of Dexmedetomidine on Posttraumatic Stress Disorder in Patients Undergoing Emergency Trauma Surgery: A Randomized Clinical Trial
Source: PubMed Central journal article supplement (PMC10276303; doi:10.1001/jamanetworkopen.2023.18611), 2023-06-16
Supplement: jamanetwopen-e2318611-s002.pdf [file jamanetwopen-e2318611-s002.pdf]

## Supplementary Online Content

Yu Y, Li Y, Han D, et al. Effect of dexmedetomidine on posttraumatic stress disorder in patients undergoing emergency trauma surgery: a randomized clinical trial. *JAMA Netw Open*. 2023;6(6):e2318611. doi:10.1001/jamanetworkopen.2023.18611

**eTable 1.** Patient Characteristics and Perioperative Data

**eTable 2.** Safety Outcomes Among the Two Groups

**eTable 3.** Association Between Dexmedetomidine Dose and Occurrence of PTSD in the Dexmedetomidine Group

**eFigure 1.** Post Hoc Analysis of Participants Who Were Compliant With Pumping Protocol to Compare the Incidence of PTSD Among 2 Groups

**eFigure 2.** Relationship Between Dexmedetomidine Dose and CAPS-5 Score

This supplementary material has been provided by the authors to give readers additional information about their work.

**eTable 1. Patient Characteristics and Perioperative Data**

| Characteristics                                                   | Patients, No. (%) (N = 350) |                              | P value |
|-------------------------------------------------------------------|-----------------------------|------------------------------|---------|
|                                                                   | Normal saline<br>(n = 175)  | Dexmedetomidine<br>(n = 175) |         |
| Sex                                                               |                             |                              |         |
| Female                                                            | 72 (41.1)                   | 64 (36.6)                    | 0.38    |
| Male                                                              | 103 (59.7)                  | 111 (63.4)                   |         |
| Age, mean (SD), y                                                 | 39.4(10.3)                  | 41.0(10.0)                   | 0.14    |
| Body mass index <sup>a</sup> , mean (SD)                          | 25.3(3.6)                   | 26.0(4.9)                    | 0.11    |
| American Society of Anesthesiologists<br>physical status category |                             |                              |         |
| I                                                                 | 120 (68.6)                  | 106(60.6)                    | 0.23    |
| II                                                                | 34 (19.4)                   | 47(26.9)                     |         |
| III                                                               | 21(12.0)                    | 22(12.5)                     |         |
| Hypertension                                                      | 31 (17.7)                   | 24 (13.7)                    | 0.30    |
| Diabetes                                                          | 22 (12.6)                   | 28(16.0)                     | 0.36    |
| Smoking                                                           | 35 (20.0)                   | 29 (16.6)                    | 0.41    |
| APACHE II, median (IQR)                                           | 7.4 (5.8-9.4)               | 7.0 (5.0-9.0)                | 0.22    |
| ISS, median (IQR)                                                 | 14.6 (7.1-19.8)             | 14.1 (9.2-19.7)              | 0.77    |
| Anatomical site of surgery                                        |                             |                              |         |
| Intestines                                                        | 44 (25.1)                   | 34 (19.4)                    |         |
| Liver/spleen                                                      | 20(11.4)                    | 31 (17.7)                    | 0.28    |
| Limb                                                              | 83 (47.4)                   | 85 (48.6)                    |         |
| Lungs/ribs/diaphragm                                              | 28 (16.0)                   | 23 (13.1)                    |         |
| Trauma time <sup>b</sup> , median (IQR), min                      | 100 (85-120)                | 95 (90-120)                  | 0.70    |
| Surgery time, median (IQR), min                                   | 95 (80-120)                 | 95 (75-120)                  | 0.59    |
| Delayed emergence from anesthesia                                 | 8(4.6)                      | 12(6.9)                      | 0.34    |
| Intraoperative know                                               | 0                           | 0                            | -       |
| Blood loss, median (IQR), mL                                      | 525 (275-700)               | 500(300-700)                 | 0.74    |
| Blood transfusion                                                 | 30(17.1)                    | 32 (18.3)                    | 0.78    |
| ICU admission                                                     | 16 (9.1)                    | 14 (8.0)                     | 0.70    |

Abbreviations: APACHE II, Acute Physiology and Chronic Health Evaluation II; ISS, injury severity score.

<sup>a</sup>Body mass index is calculated as weight in kilograms divided by height in meters squared.

<sup>b</sup>Trauma time was the time from calling the emergency calls to anesthesia induction.

**eTable 2. Safety Outcomes Among the Two Groups**

|                                           | Normal saline<br>(n = 154) | Dexmedetomidine<br>(n = 156) | $\chi^2$ | P value |
|-------------------------------------------|----------------------------|------------------------------|----------|---------|
| Adverse events                            |                            |                              |          |         |
| Bradycardia                               | 20                         | 28                           | 1.46     | 0.23    |
| Hypotension                               | 32                         | 39                           | 0.78     | 0.38    |
| Tachycardia                               | 21                         | 11                           | 3.63     | 0.06    |
| Hypertension                              | 10                         | 5                            | 1.82     | 0.18    |
| Hypoxaemia                                | 2                          | 0                            | 2.04     | 0.25    |
| Modification of infusion                  |                            |                              |          |         |
| None <sup>a</sup>                         | 123                        | 118                          | 0.80     | 0.37    |
| Infusion stopped temporarily <sup>b</sup> | 5                          | 8                            | NA       | NA      |
| Infusion stopped permanently <sup>b</sup> | 3                          | 2                            | NA       | NA      |
| Infusion rate decreased <sup>b</sup>      | 2                          | 3                            | NA       | NA      |
| Others <sup>b</sup>                       | 21                         | 25                           | NA       | NA      |

Abbreviations: NA, not applicable.

<sup>a</sup> Complied with the pumping protocol.

<sup>b</sup> Did not comply with the pumping protocol.

**eTable 3.** Association Between Dexmedetomidine Dose and Occurrence of PTSD in the Dexmedetomidine Group

| <b>Facts</b>                 | <b>B</b> | <b>SE</b> | <b>Wald</b> | <b>OR</b> | <b>95%CI</b> | <b>P value</b> |
|------------------------------|----------|-----------|-------------|-----------|--------------|----------------|
| Dex dose                     | -0.10    | 0.05      | 5.28        | 0.90      | 0.82-0.99    | 0.02           |
| Age                          | 0.00     | 0.03      | 0.03        | 1.00      | 0.95-1.06    | 0.88           |
| Sex <sup>a</sup>             | -0.65    | 0.61      | 1.11        | 0.52      | 0.16-1.74    | 0.29           |
| ISS                          | -0.06    | 0.05      | 1.39        | 0.95      | 0.86-1.04    | 0.24           |
| APACHE II                    | 0.02     | 0.10      | 0.06        | 1.03      | 1.03-0.85    | 0.80           |
| Trauma time                  | -0.01    | 0.01      | 0.99        | 0.99      | 0.96-1.01    | 0.32           |
| Surgery time                 | -0.00    | 0.01      | 0.05        | 1.00      | 0.98-1.01    | 0.82           |
| Smoking <sup>b</sup>         | 0.03     | 0.69      | 0.00        | 1.03      | 0.27-4.01    | 0.96           |
| Surgery type                 | NA       | NA        | 4.83        | NA        | NA           | 0.19           |
| Surgery type(1) <sup>c</sup> | -1.06    | 0.82      | 1.65        | 0.35      | 0.13-2.73    | 0.20           |
| Surgery type(2) <sup>c</sup> | -1.46    | 0.68      | 4.65        | 0.23      | 0.08-1.02    | 0.03           |
| Surgery type(3) <sup>c</sup> | -1.20    | 0.87      | 1.88        | 0.30      | 0.06-1.67    | 0.17           |
| ICU admission <sup>d</sup>   | 2.96     | 1.08      | 7.55        | 19.30     | 2.34-159.47  | 0.01           |
| Study sites                  | NA       | NA        | 5.19        | NA        | NA           | 0.16           |
| Study sites(1) <sup>e</sup>  | 0.84     | 0.60      | 1.94        | 2.32      | 0.08-1.02    | 0.16           |
| Study sites(2) <sup>e</sup>  | 0.43     | 0.87      | 0.24        | 1.53      | 0.08-1.02    | 0.62           |
| Study sites(3) <sup>e</sup>  | -1.83    | 1.29      | 2.00        | 0.16      | 0.08-1.02    | 0.16           |

Abbreviations: Dex, Dexmedetomidine ; APACHE II, Acute Physiology and Chronic Health Evaluation II; ISS, injury severity score; NA, not applicable; ICU, intensive care unit.

<sup>a</sup> Males were used as the reference.

<sup>b</sup> Non-smoking was used as the reference.

<sup>c</sup> The surgical site was the intestine as the reference.

<sup>d</sup> No ICU admission was used as the reference.

<sup>e</sup> Xuzhou Renci hospital was used as the reference.

**eFigure 1.** Post Hoc Analysis of Participants Who Were Compliant With Pumping Protocol to Compare the Incidence of PTSD Among 2 Groups

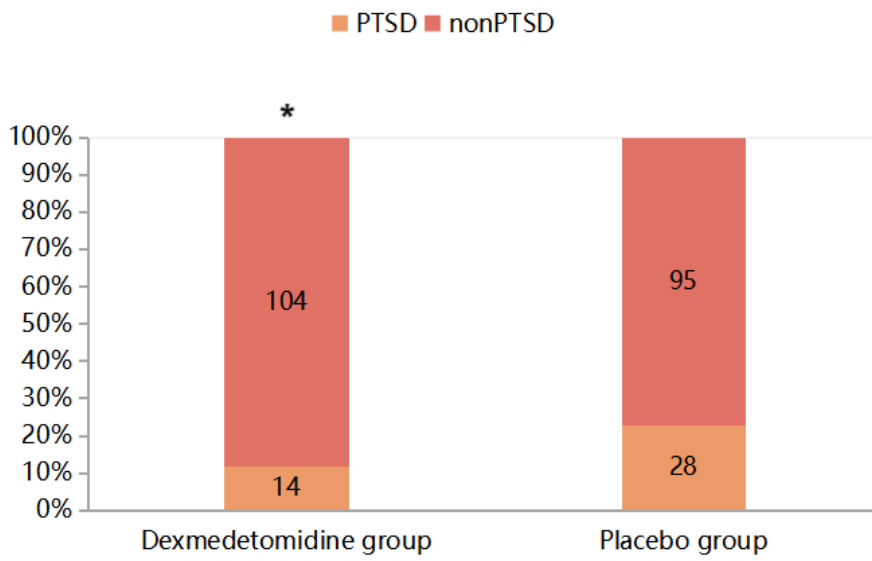

Abbreviations: PTSD, post-traumatic stress disorder

\* P < 0.05 compared with the placebo group.

eFigure 2. Relationship Between Dexmedetomidine Dose and CAPS-5 Score

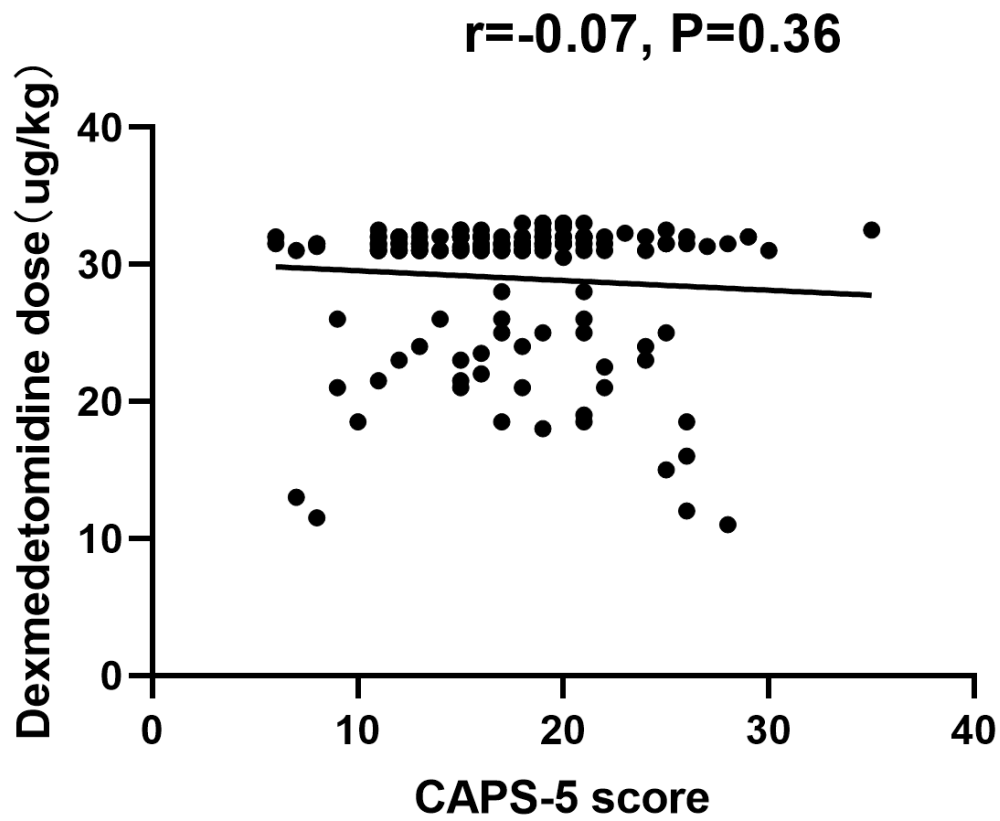

Abbreviations: CAPS-5, Clinician-Administered PTSD Scale for DSM-5.
