# Supplementary material for: Effect of Dexmedetomidine on Posttraumatic Stress Disorder in Patients Undergoing Emergency Trauma Surgery: A Randomized Clinical Trial
Source: PubMed Central journal article supplement (PMC10276303; doi:10.1001/jamanetworkopen.2023.18611), 2023-06-16
Supplement: jamanetwopen-e2318611-s003.pdf [file jamanetwopen-e2318611-s003.pdf]

## Data Sharing Statement

Yu. Effect of Dexmedetomidine on Posttraumatic Stress Disorder in Patients Undergoing Emergency Trauma Surgery. *JAMA Netw Open*. Published June 16, 2023.

doi:10.1001/jamanetworkopen.2023.18611

### Data

**Data available:** Yes

**Data types:** Deidentified participant data

**How to access data:** [zhuyz@188.com](mailto:zhuyz@188.com) or [yaorui\\_edu@163.com](mailto:yaorui_edu@163.com)

**When available:** With publication

### Supporting Documents

**Document types:** Statistical/analytic code

**How to access documents:** [zhuyz@188.com](mailto:zhuyz@188.com) or [yaorui\\_edu@163.com](mailto:yaorui_edu@163.com)

**When available:** With publication

### Additional Information

**Who can access the data:** researchers whose proposed use of the data has been approved

**Types of analyses:** for a specified purpose

**Mechanisms of data availability:** with investigator support
